# Supplementary material for: Human periventricular nodular heterotopia shows several interictal epileptic patterns, associated with hyperexcitability of neuronal firing
Source: bioRxiv or medRxiv preprint supplement (doi:10.1101/816173), 2022-05-05

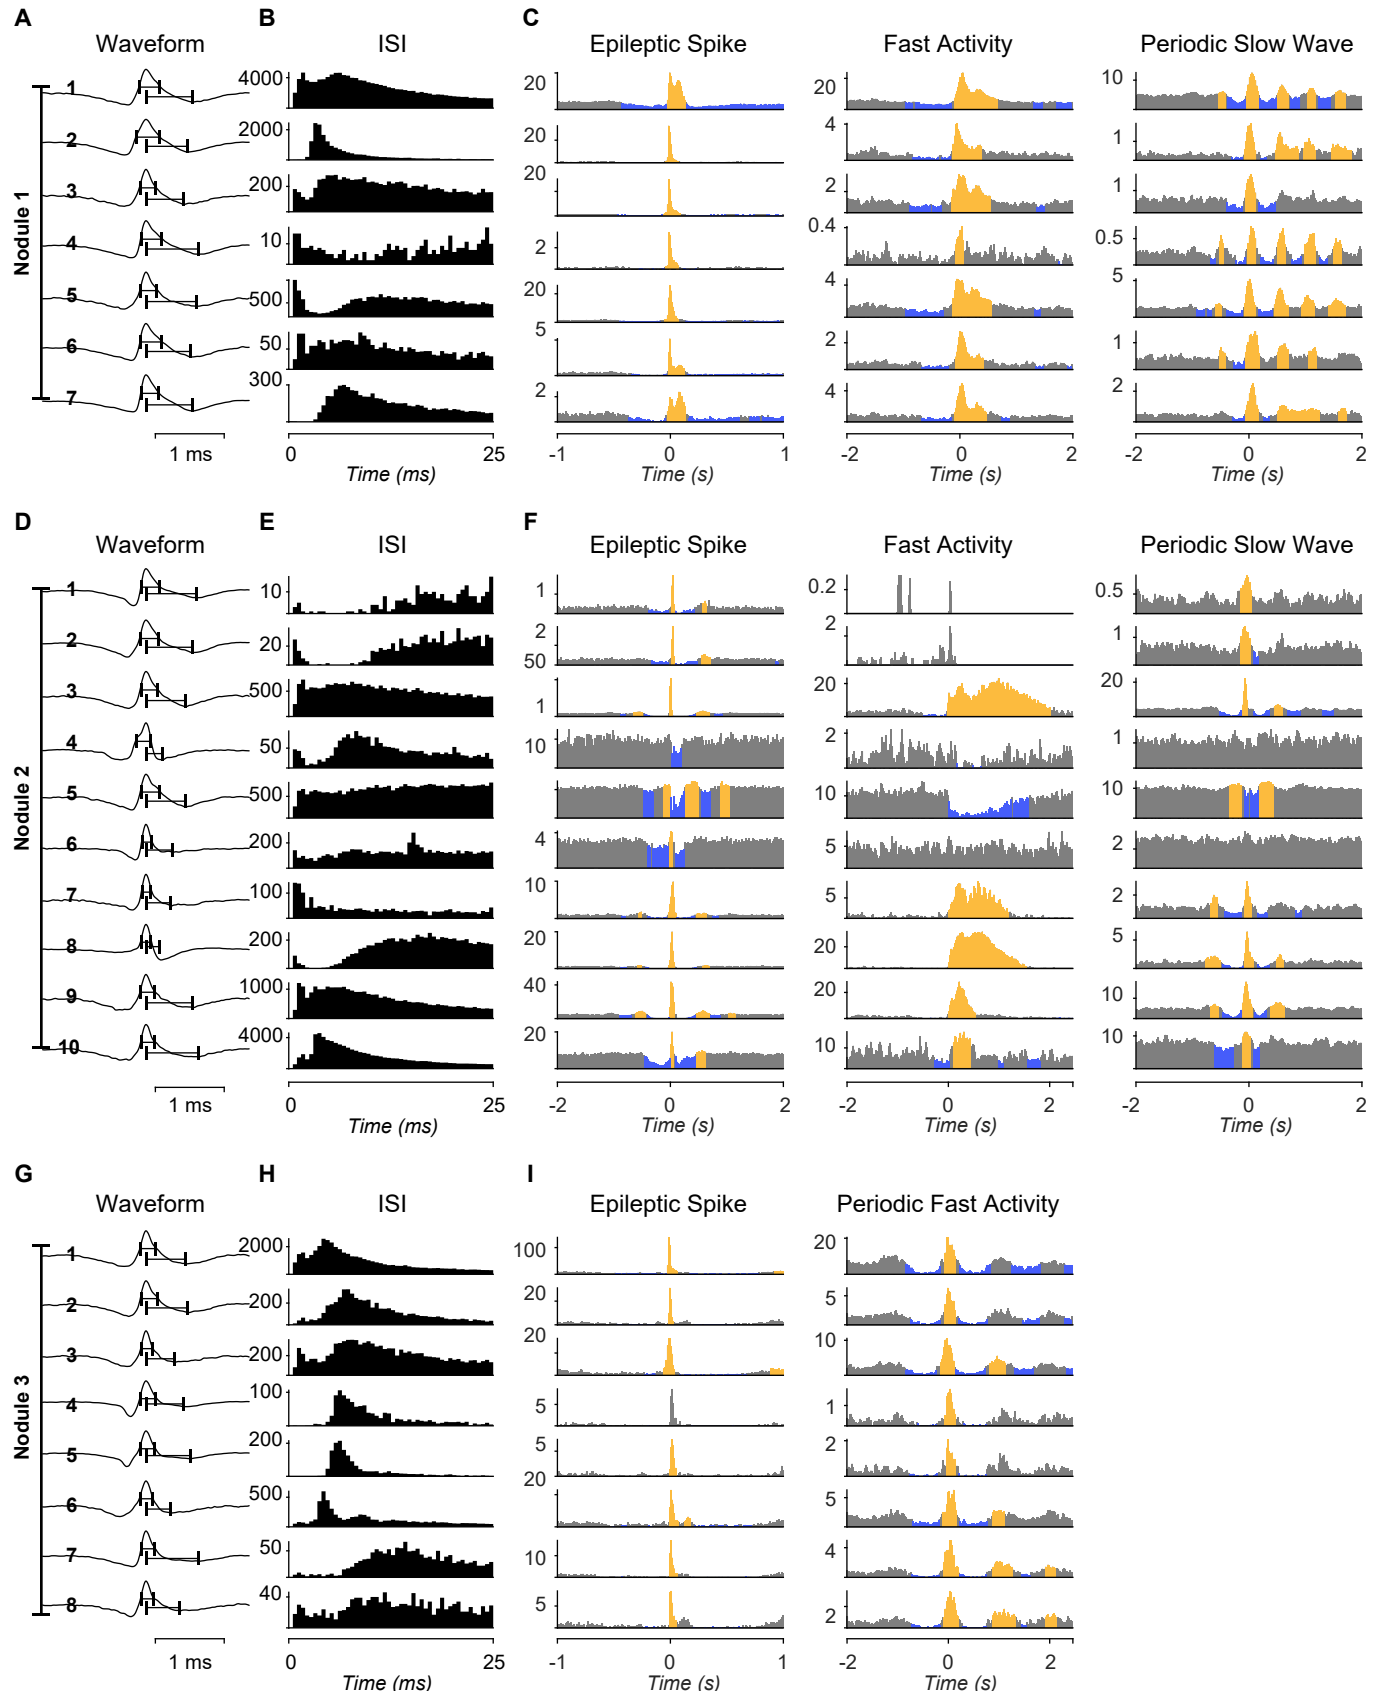

Supplement: Supplementary file [file media-2.pdf]
